# Supplementary material for: Structure-Based Study to Overcome Cross-Reactivity of Novel Androgen Receptor Inhibitors
Source: MDPI journal article supplement (doi:10.3390/cells11182785), 2022-09-07

## Supplementary Information

**Figure S1:** Chemical structures and PDB codes of existing AR binders co-crystallized with AR-LBD. The colour-coded spheres represent points of interaction with the AR LBD residues. Structural classification of co-crystallized AR binders based on the structural similarity is represented by boxes, i.e. compounds boxed together represent a group of structurally similar compounds.

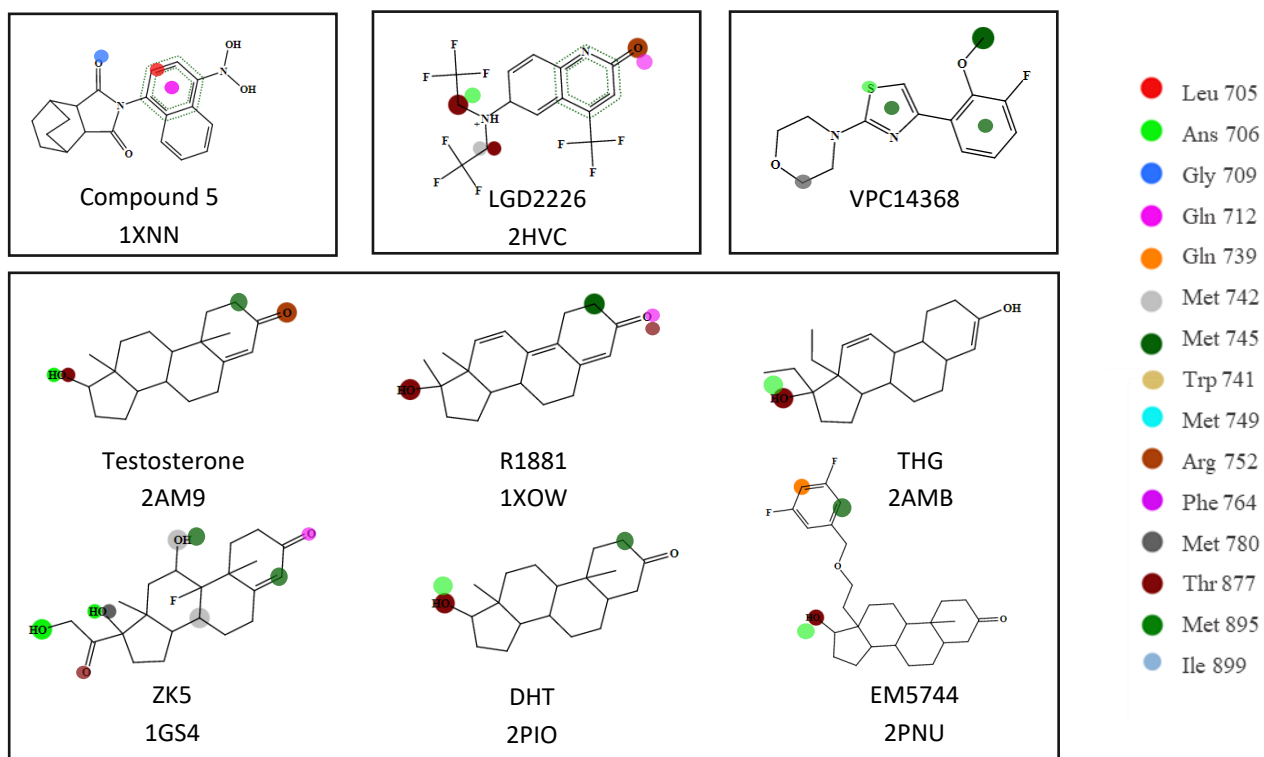

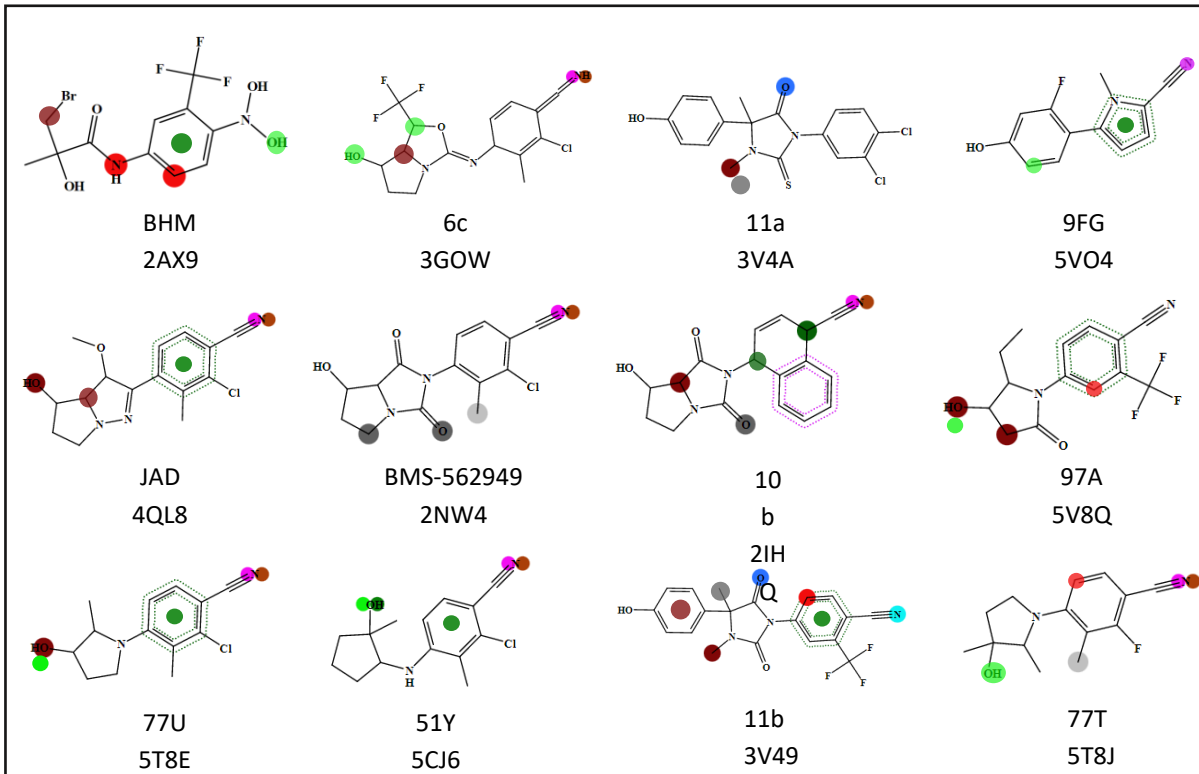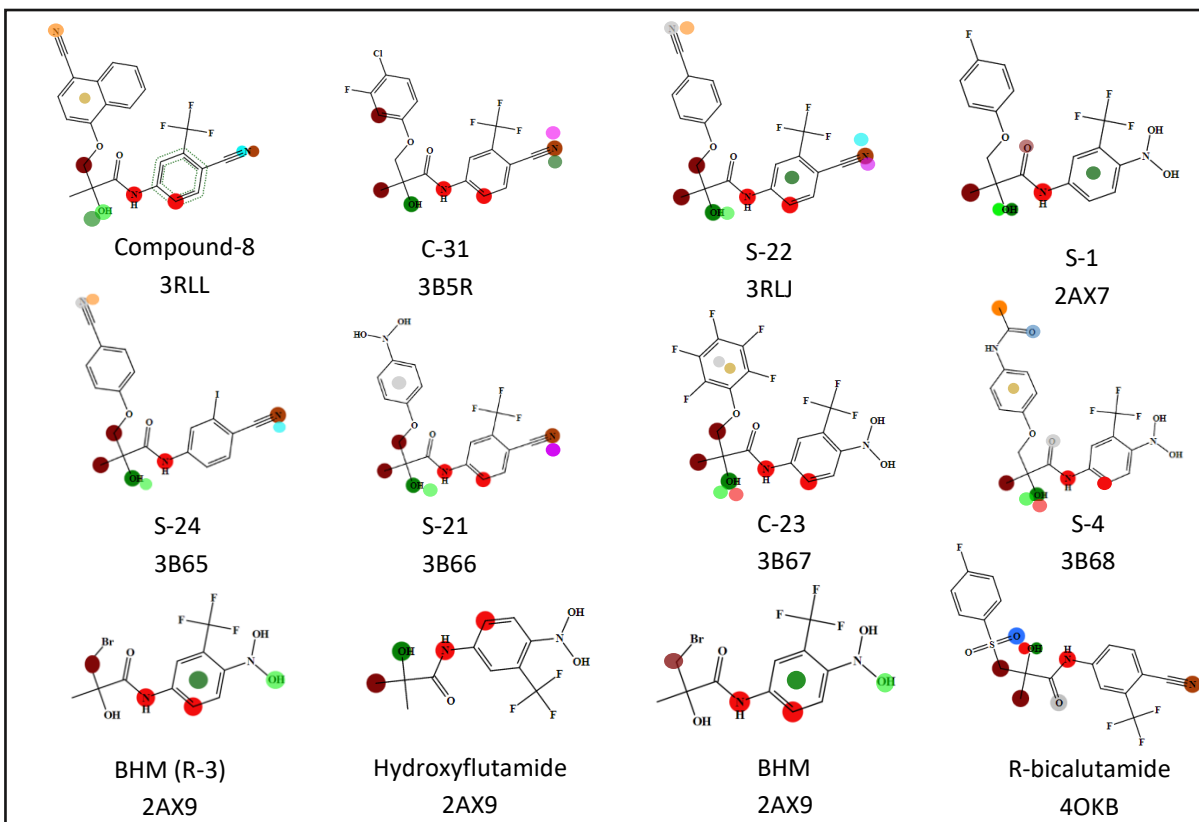

Supplement: s1 [file s1]
